# Supplementary material
Source: PubMed Central journal article supplement (PMC8522630)

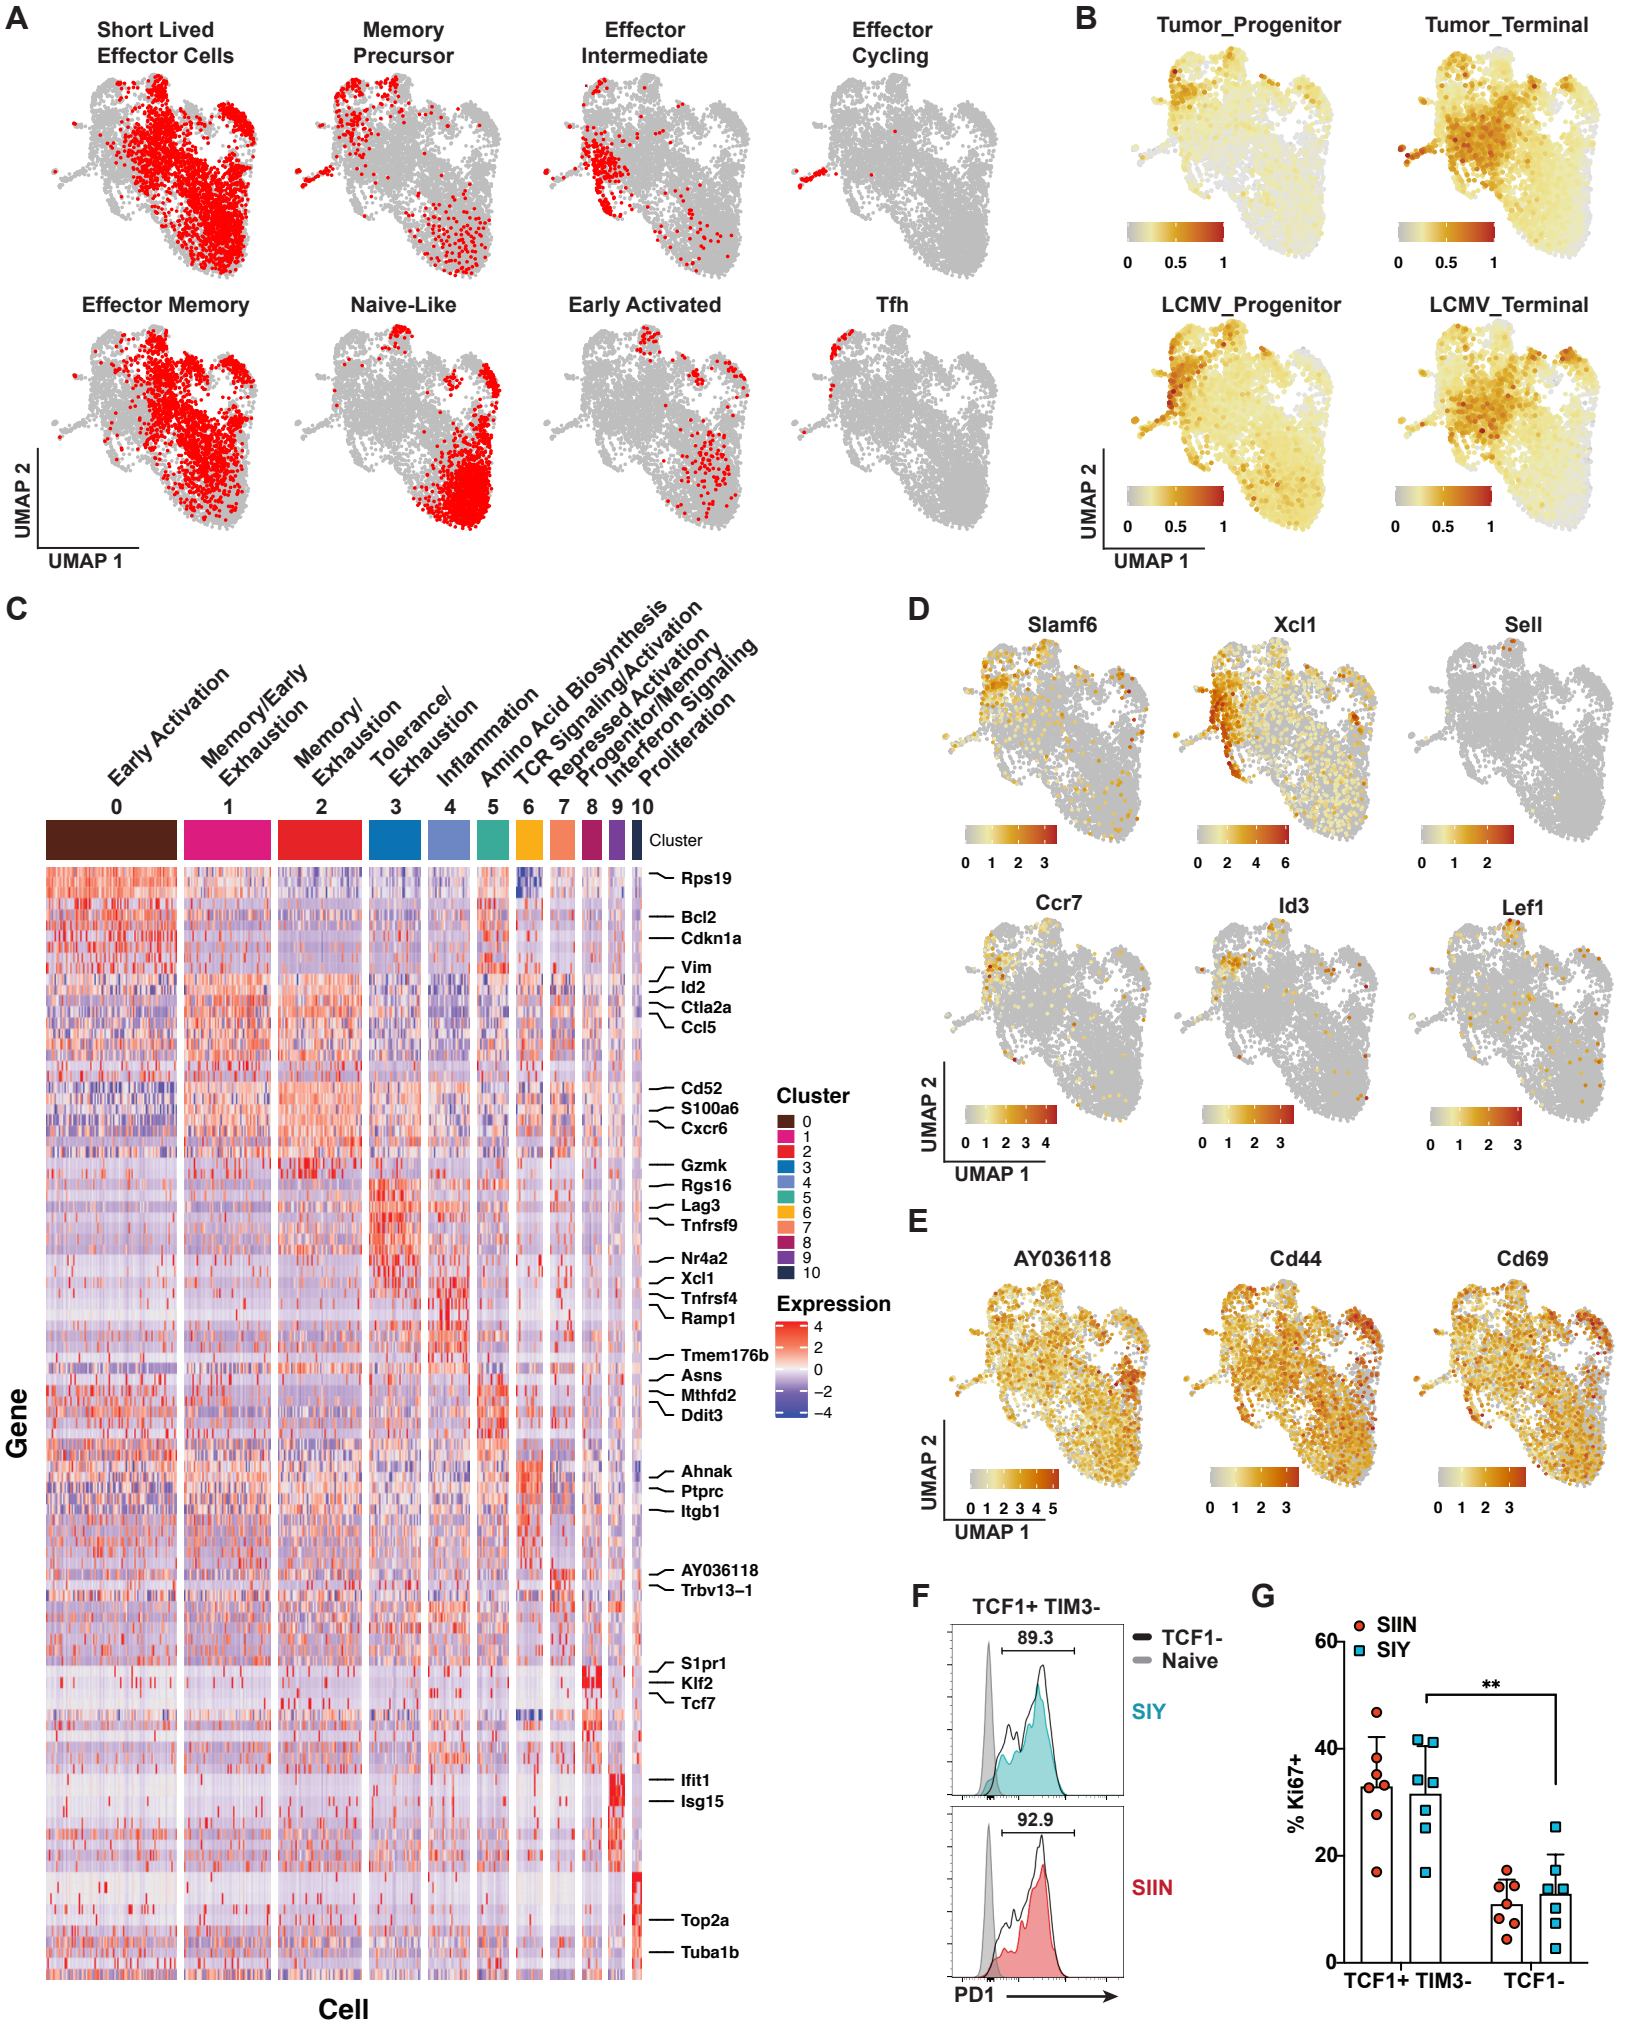

Supplement: NIHMS1739841-supplement-2.pdf [file NIHMS1739841-supplement-2.pdf]

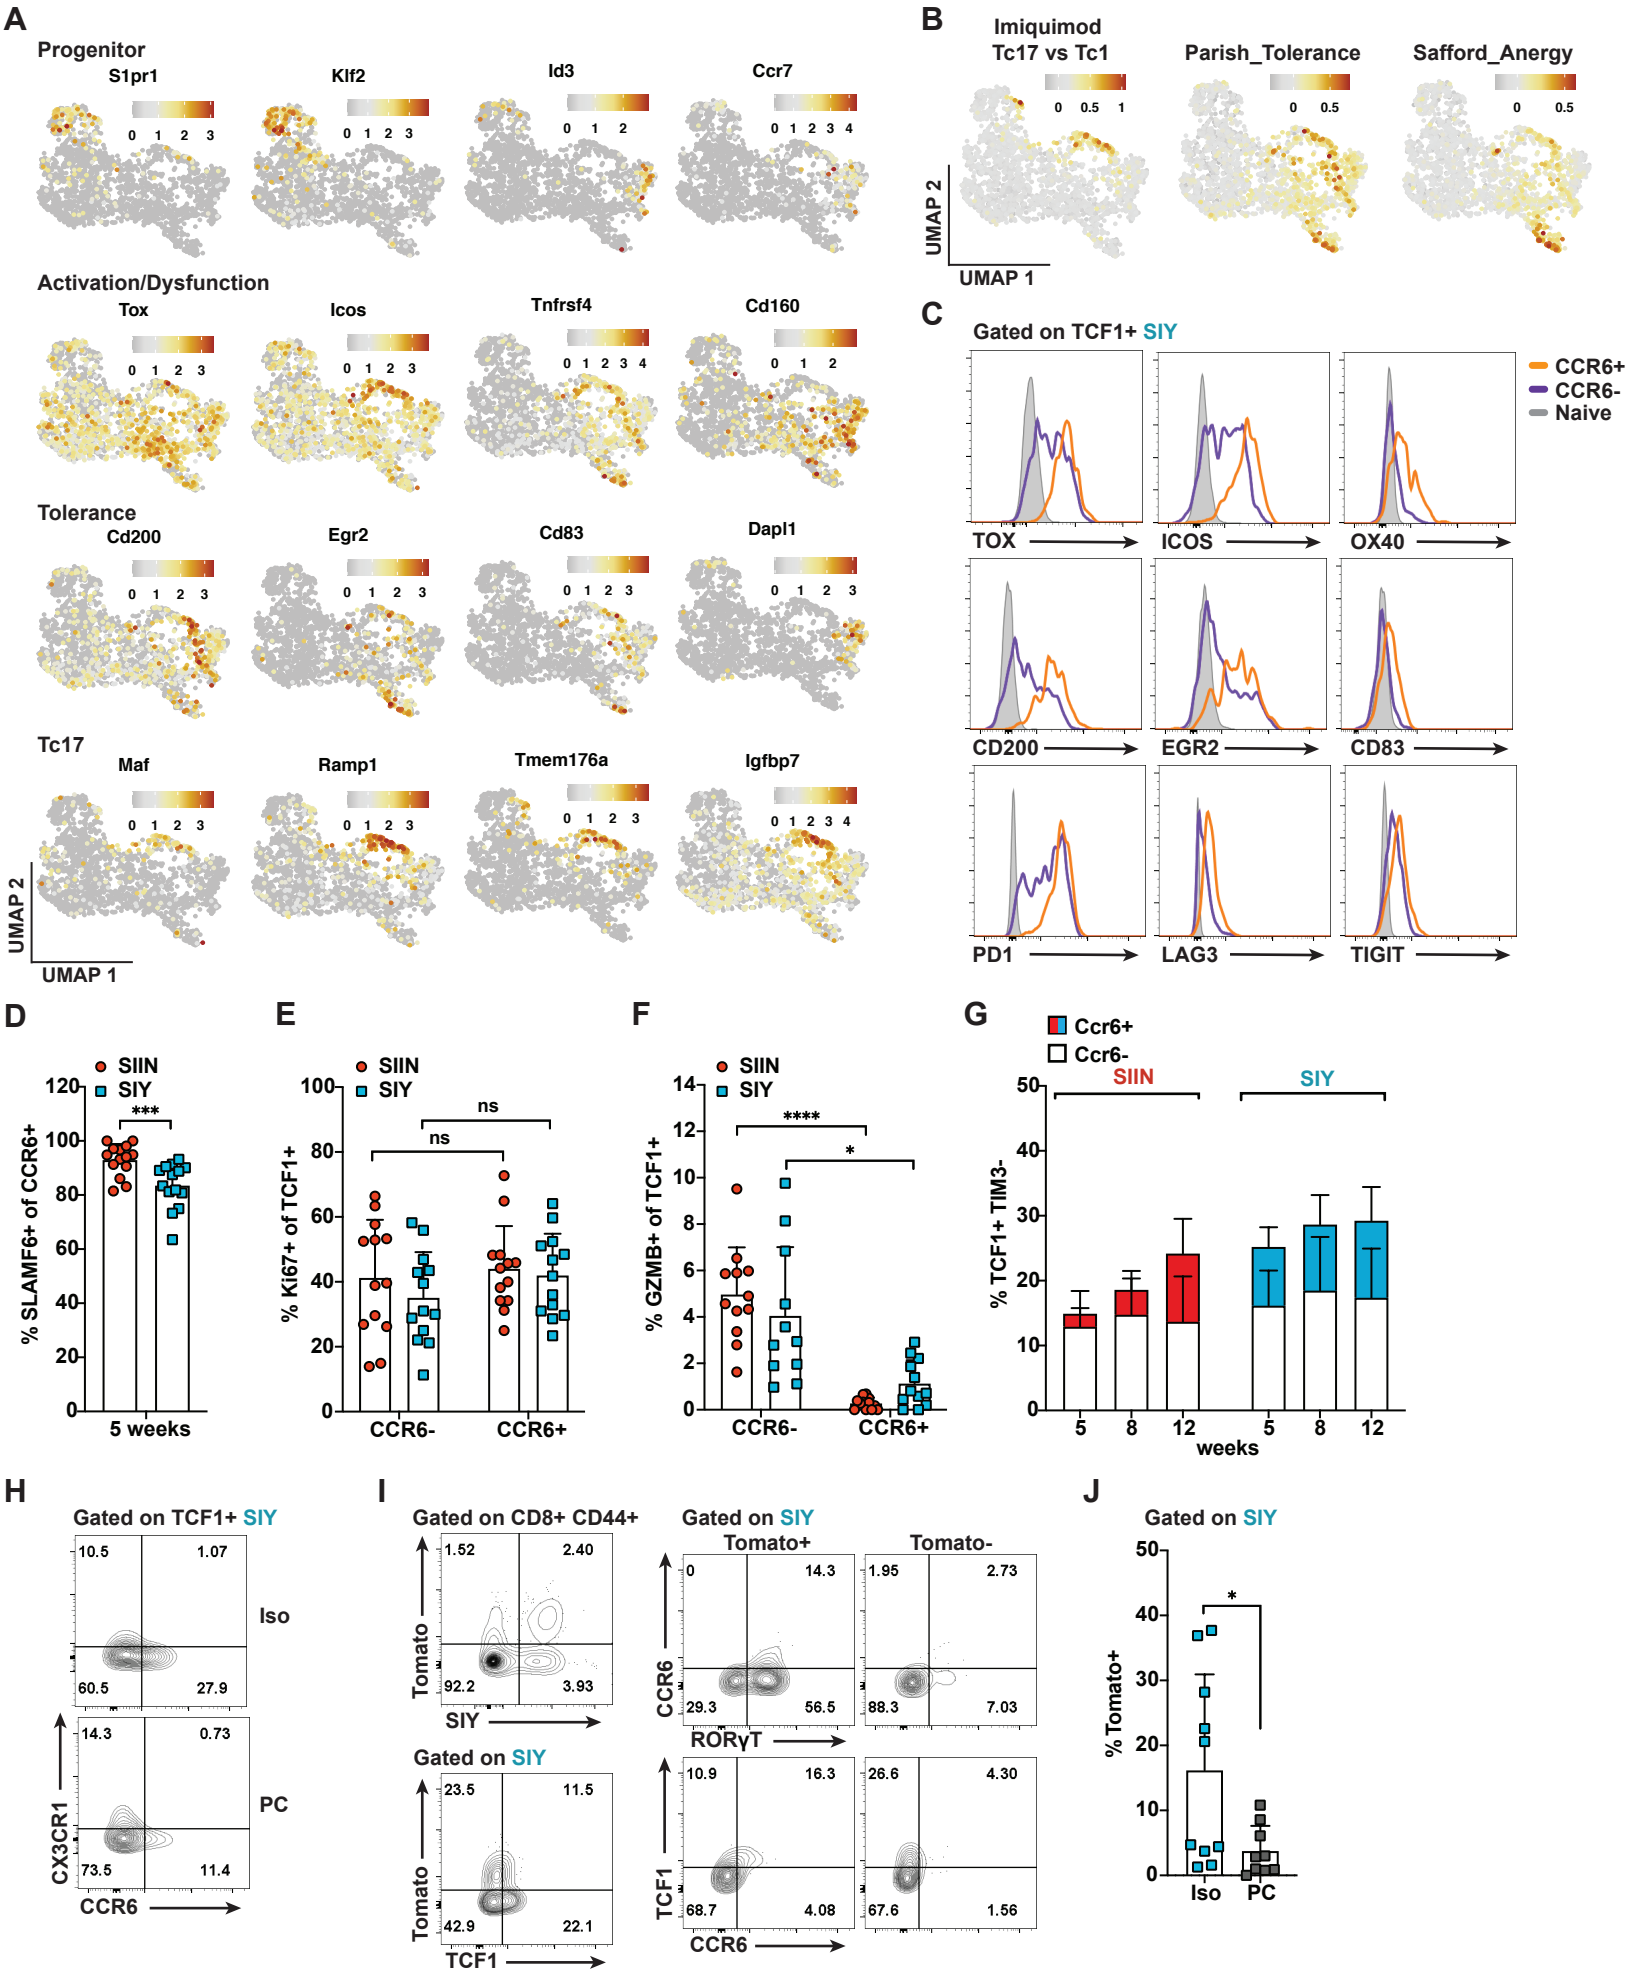

Supplement: NIHMS1739841-supplement-5.pdf [file NIHMS1739841-supplement-5.pdf]

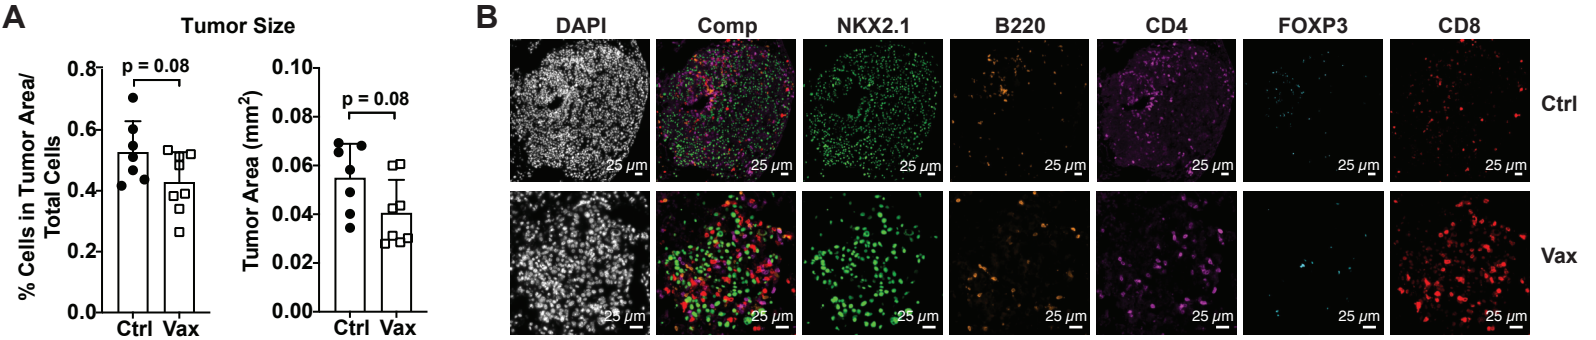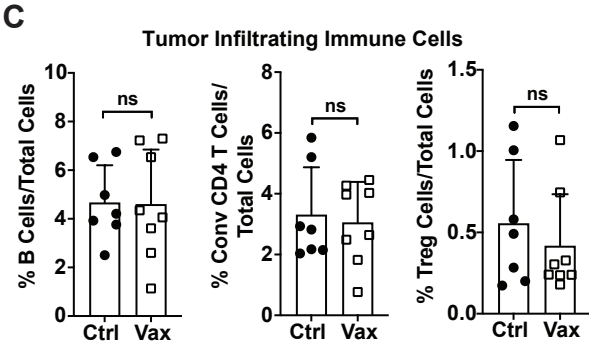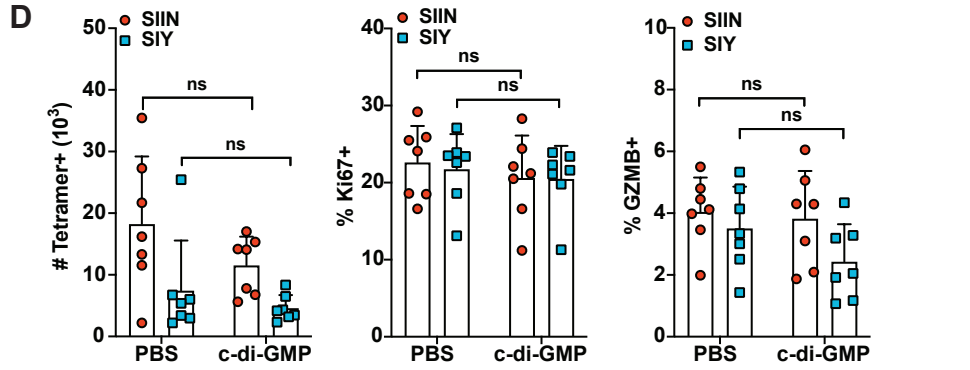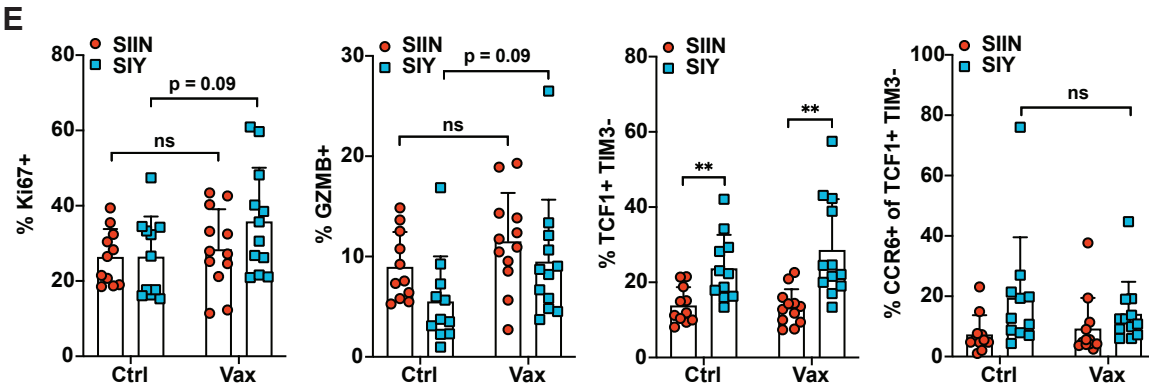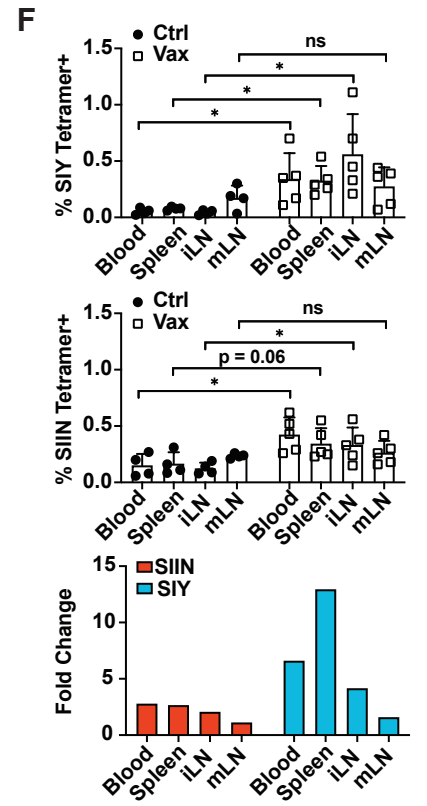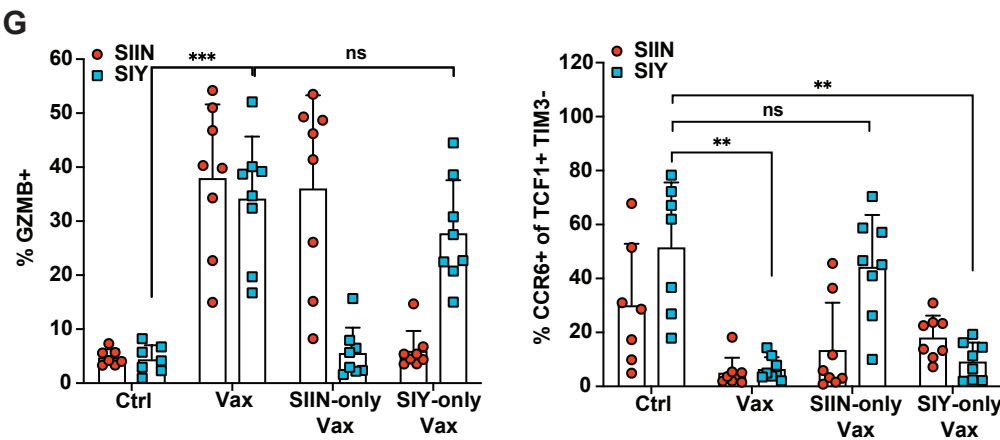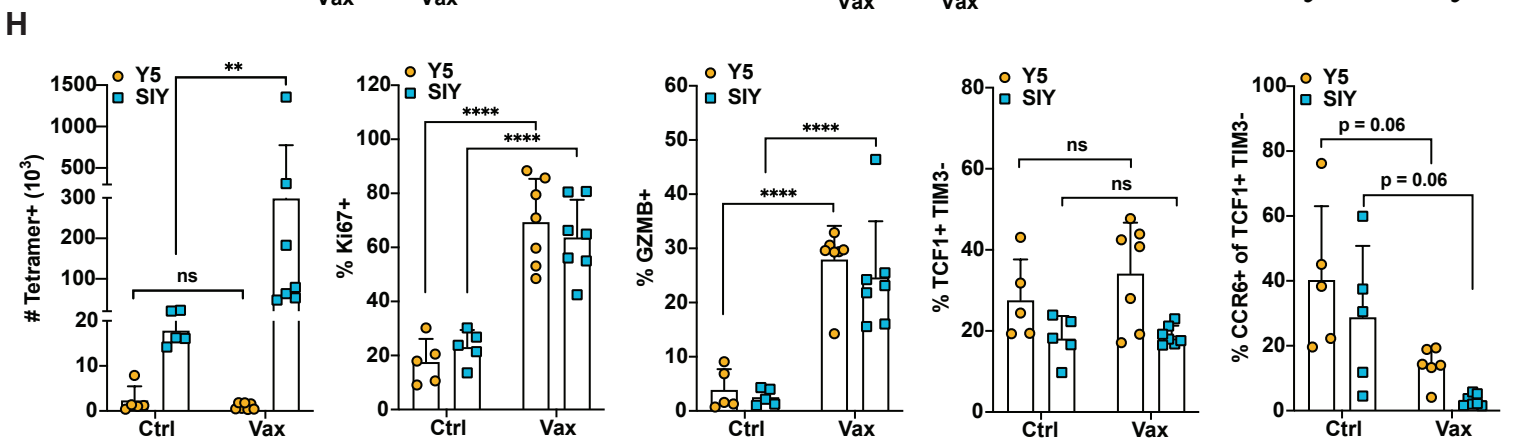

Supplement: NIHMS1739841-supplement-6.pdf [file NIHMS1739841-supplement-6.pdf]
